# Supplementary material for: The Evaluation of an Interprofessional QI Program: A Qualitative Study
Source: MDPI journal article supplement (doi:10.3390/ijerph191610087), 2022-08-15
Supplement: s1 [file s1]

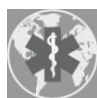

## Supplementary Materials

**Table S1.** Interview schedules according to CIPP-method.

|                |                                                                                                               | Material for Analysis                    |
|----------------|---------------------------------------------------------------------------------------------------------------|------------------------------------------|
| <b>Context</b> | <i>Goal(s)</i>                                                                                                | Curriculum<br>Focus groups<br>Interviews |
|                | <i>Needs/ Requirements</i>                                                                                    | Focus groups<br>Interviews               |
|                | <i>Educational environment: History of the Amsterdam UMC, background of quality improvement in healthcare</i> | Focus groups<br>Literature QI            |
| <b>Input</b>   | <i>Course material, time</i>                                                                                  | Curriculum<br>Focus groups<br>Interviews |
|                | <i>Human resources: fellow participants, coaches, colleagues in Amsterdam UMC, QI network, advisory board</i> | Focus groups<br>Interviews               |
| <b>Process</b> | <i>Interdisciplinary learning</i>                                                                             | Focus groups<br>Interviews               |
|                | <i>Communication</i>                                                                                          | Focus groups<br>Interviews               |
|                | <i>Motivation participants</i>                                                                                | Focus groups<br>Interviews               |
| <b>Product</b> | <i>Goals reached?</i>                                                                                         | Curriculum<br>Focus groups<br>Interviews |
|                | <i>Outcomes: Knowledge gained (in practice) &amp; Result QI project</i>                                       | Focus groups<br>Interviews               |
|                | <i>Creating a community of quality experts within Amsterdam UMC</i>                                           | Focus groups<br>Interviews               |
